# Supplementary material for: Effects of Controlled Ozone Exposure on Circulating microRNAs and Vascular and Coagulation Biomarkers: A Mediation Analysis
Source: MDPI journal article supplement (doi:10.3390/ncrna9040043), 2023-08-01
Supplement: s1 [file s1]

**Supplemental Table 1.** Descriptive statistics of all miRNA parameters.

| miRNAs             | CTL (n=6)              |                        | FO (n=7)               |                        | OO (n=10)              |                        | All (n=23)              |
|--------------------|------------------------|------------------------|------------------------|------------------------|------------------------|------------------------|-------------------------|
|                    | Filtered air           | Ozone                  | Filtered air           | Ozone                  | Filtered air           | Ozone                  |                         |
| <i>let-7d-5p</i>   | 30.9 (24.8, 37.1)      | 36.2 (27, 45.5)        | 32.6 (25.2, 40.1)      | 32.7 (23.4, 42.0)      | 29.4 (24.9, 33.9)      | 28.9 (24.0, 33.8)      | 31.4 (29.1, 33.6)       |
| <i>let-7e-5p</i>   | 4.2 (3.6, 4.8)         | 5.3 (3.5, 7.0)         | 3.5 (1.8, 5.1)         | 4.1 (2.8, 5.4)         | 3.5 (2.3, 4.6)         | 4.1 (3.2, 4.9)         | 4.0 (3.6, 4.5)          |
| <i>let-7g-5p</i>   | 32.9 (26.4, 39.4)      | 30.8 (25.1, 36.4)      | 29.1 (21.6, 36.7)      | 31.9 (26.8, 37.0)      | 37.3 (26.1, 48.4)      | 28.7 (22.2, 35.2)      | 31.9 (29.0, 34.8)       |
| <i>let-7i-5p</i>   | 58.7 (45.1, 72.3)      | 58 (43.5, 72.4)        | 66.1 (50.7, 81.5)      | 64 (52.5, 75.6)        | 63.7 (53.5, 73.8)      | 65.1 (59.1, 71.0)      | 63.0 (59.3, 66.8)       |
| <i>miR-375</i>     | 1.0 (0.3, 1.7)         | 0.9 (0.4, 1.4)         | 0.9 (0.3, 1.5)         | 2.1 (0.4, 3.9)         | 0.7 (0.3, 1.1)         | 1.0 (0.5, 1.5)         | 1.1 (0.8, 1.4)          |
| <i>miR-103a-3p</i> | 177.2 (150.5, 203.9)   | 178.2 (143.4, 213)     | 190.8 (151.9, 229.8)   | 167.3 (120, 214.7)     | 180.6 (155.1, 206.0)   | 167.5 (151.1, 184.0)   | 176.5 (166.2, 186.8)    |
| <i>miR-106b-5p</i> | 50.1 (42.8, 57.3)      | 52.1 (46.6, 57.6)      | 51.4 (40.4, 62.4)      | 50.6 (41.1, 60.0)      | 55.4 (40.1, 70.6)      | 49.9 (43.5, 56.3)      | 51.7 (48.1, 55.4)       |
| <i>miR-122-5p</i>  | 66.2 (39.4, 93)        | 127.9 (51.3, 204.5)*   | 62.2 (22.9, 101.4)     | 66.8 (44.9, 88.7)      | 57.8 (46.2, 69.4)      | 64.2 (32.4, 96.1)      | 71.5 (58.4, 84.5)       |
| <i>miR-124-3p</i>  | 0.1 (0.0, 0.1)         | 0.1 (0.0, 0.2)         | 0.1 (0.0, 0.3)         | 0.2 (0.0, 0.4)         | 0.2 (0.0, 0.4)         | 0.2 (0.0, 0.5)         | 0.2 (0.1, 0.2)          |
| <i>miR-125a-5p</i> | 0.2 (0.0, 0.4)         | 0.1 (0.0, 0.3)         | 0.1 (-0.1, 0.4)        | 0.3 (0.1, 0.5)         | 0.2 (-0.1, 0.5)        | 0.2 (0.1, 0.3)         | 0.2 (0.1, 0.3)          |
| <i>miR-125b-5p</i> | 0.1 (-0.1, 0.3)        | 0.2 (0.0, 0.3)         | 0.3 (0.0, 0.6)         | 0.1 (0.0, 0.1)*        | 0.1 (0.0, 0.2)         | 0.2 (0.0, 0.4)         | 0.2 (0.1, 0.2)          |
| <i>miR-126-3p</i>  | 78.1 (70.9, 85.4)      | 79.0 (62.9, 95)        | 76.0 (65.8, 86.3)      | 79.8 (57.7, 101.9)     | 80.6 (70.9, 90.4)      | 78.6 (70.0, 87.1)      | 78.8 (74.7, 82.9)       |
| <i>miR-133a-3p</i> | 0.8 (-0.2, 1.8)        | 0.4 (-0.1, 0.9)        | 0.6 (-0.2, 1.4)        | 0.9 (-0.4, 2.1)        | 0.5 (0.0, 1.0)         | 0.6 (0.2, 1.0)         | 0.6 (0.4, 0.9)          |
| <i>miR-133b</i>    | 0.7 (-0.3, 1.7)        | 0.3 (-0.2, 0.7)        | 0.5 (-0.2, 1.1)        | 0.6 (-0.3, 1.6)        | 0.5 (-0.1, 1.2)        | 0.4 (0.1, 0.8)         | 0.5 (0.3, 0.7)          |
| <i>miR-142-3p</i>  | 1.1 (0.3, 1.8)         | 1.1 (0.0, 2.2)         | 0.7 (0.3, 1.1)         | 1.0 (0.4, 1.6)         | 0.9 (0.4, 1.4)         | 0.9 (0.6, 1.3)         | 0.9 (0.7, 1.1)          |
| <i>miR-144-5p</i>  | 0.14 (-0.07, 0.35)     | 0.16 (0.0, 0.32)       | 0.01 (-0.01, 0.03)     | 0.19 (0.04, 0.34)*     | 0.16 (-0.02, 0.34)     | 0.09 (-0.02, 0.20)     | 0.12 (0.07, 0.18)       |
| <i>miR-145-5p</i>  | 4.3 (1.7, 6.9)         | 3.8 (2.6, 5.1)         | 3.8 (1.6, 6.0)         | 3.9 (2.6, 5.3)         | 4.2 (3.3, 5.1)         | 4.5 (3.1, 5.8)         | 4.1 (3.6, 4.6)          |
| <i>miR-146a-5p</i> | 99.8 (83.0, 116.5)     | 99.1 (81.5, 116.7)     | 129.0 (106.2, 151.8)   | 119.1 (90.0, 148.2)    | 112.2 (94.9, 129.6)    | 110.7 (99.0, 122.5)    | 112.2 (105.3, 119.1)    |
| <i>miR-150-5p</i>  | 21.5 (13.1, 30.0)      | 36.1 (7.7, 64.4)       | 27.1 (12.7, 41.4)      | 45.1 (14.6, 75.6)      | 43.2 (22.2, 64.3)      | 43.3 (19.5, 67.1)      | 37.3 (29.3, 45.4)       |
| <i>miR-155-5p</i>  | 0.4 (-0.2, 1.1)        | 0.6 (0.3, 1.0)*        | 0.8 (0.3, 1.3)         | 0.5 (0.1, 1.0)         | 0.3 (0.0, 0.7)         | 0.7 (0.4, 1.0)         | 0.6 (0.4, 0.7)          |
| <i>miR-15b-5p</i>  | 84.8 (72.3, 97.2)      | 90.6 (80.7, 100.5)     | 82.0 (66.4, 97.5)      | 84.2 (75.2, 93.1)      | 81.6 (74.6, 88.7)      | 84.8 (75.2, 94.4)      | 84.3 (80.8, 87.8)       |
| <i>miR-16-5p</i>   | 1060.3 (807.4, 1313.1) | 1156.2 (809.5, 1502.9) | 1165.5 (857.5, 1473.6) | 1223.1 (863.3, 1582.8) | 1174.3 (878.7, 1469.9) | 1170.6 (937.1, 1404.2) | 1162.4 (1063.4, 1261.3) |
| <i>miR-17-5p</i>   | 282.5 (265.4, 299.6)   | 280.8 (255.8, 305.9)   | 302.4 (268.6, 336.2)   | 285.0 (274.9, 295.1)   | 289.2 (279.4, 298.9)   | 287.8 (274.8, 300.9)   | 288.3 (282.1, 294.5)    |
| <i>miR-181b-5p</i> | 3.9 (2.3, 5.5)         | 4.3 (3.6, 5.0)         | 2.3 (1.3, 3.4)         | 3.7 (2.9, 4.5)         | 3.6 (1.4, 5.8)         | 4.0 (2.6, 5.3)         | 3.6 (3.1, 4.2)          |

Supplemental Table 1 continued

|                    |                      |                     |                     |                     |                     |                     |                      |
|--------------------|----------------------|---------------------|---------------------|---------------------|---------------------|---------------------|----------------------|
| <i>miR-18a-5p</i>  | 11.4 (8.5, 14.3)     | 10.7 (6.3, 15.0)    | 11.8 (9.5, 14.0)    | 10.5 (8.9, 12.2)    | 10.2 (9.2, 11.3)    | 9.7 (7.3, 12.2)     | 10.6 (9.8, 11.4)     |
| <i>miR-192-5p</i>  | 5.1 (3.2, 7.1)       | 7.4 (3.6, 11.1)     | 5.8 (2.3, 9.3)      | 7.8 (4.9, 10.6)     | 5.4 (3.9, 6.9)      | 6.1 (3.5, 8.6)      | 6.2 (5.3, 7.1)       |
| <i>miR-194-5p</i>  | 2.5 (1.2, 3.9)       | 3.6 (1.4, 5.9)      | 2.3 (1.3, 3.3)      | 3.1 (2.3, 3.8)      | 2.3 (1.7, 2.8)      | 2.8 (1.9, 3.7)      | 2.7 (2.4, 3.1)       |
| <i>miR-195-5p</i>  | 73 (46.4, 99.6)      | 87.6 (43.4, 131.8)  | 57.2 (43, 71.4)     | 62.7 (46.5, 78.9)   | 71.7 (49.4, 93.9)   | 61.3 (46.2, 76.3)   | 68.1 (60.2, 76)      |
| <i>miR-199a-3p</i> | 55.3 (44.5, 66.1)    | 52.3 (33.6, 70.9)   | 52.4 (36.5, 68.3)   | 51.1 (38.1, 64.1)   | 55.0 (45.9, 64.2)   | 50.0 (39.1, 60.9)   | 52.6 (48.5, 56.8)    |
| <i>miR-199a-5p</i> | 31.4 (25.8, 37.0)    | 26.7 (17.5, 36)     | 33.1 (26.3, 39.9)   | 27.0 (20.4, 33.5)   | 28.9 (24.2, 33.6)   | 26.2 (21.1, 31.3)   | 28.7 (26.6, 30.8)    |
| <i>miR-19a-3p</i>  | 15.2 (8.9, 21.5)     | 11.2 (9.5, 12.8)    | 12.4 (9, 15.9)      | 13 (8.7, 17.3)      | 15.1 (11.5, 18.8)   | 10.5 (8.3, 12.8)*   | 12.9 (11.6, 14.2)    |
| <i>miR-1-3p</i>    | 0.2 (-0.1, 0.6)      | 0.1 (0.0, 0.3)      | 0.3 (-0.1, 0.6)     | 0.3 (-0.1, 0.7)     | 0.2 (0.0, 0.5)      | 0.2 (0.0, 0.4)      | 0.2 (0.1, 0.3)       |
| <i>miR-208a-3p</i> | 0.2 (-0.2, 0.5)      | 0.1 (-0.1, 0.3)     | 0.2 (-0.1, 0.4)     | 0.2 (0.0, 0.4)      | 0.2 (0.0, 0.3)      | 0.1 (0.0, 0.3)      | 0.2 (0.1, 0.2)       |
| <i>miR-208b-3p</i> | 0.2 (-0.1, 0.4)      | 0.2 (0.1, 0.3)      | 0.2 (0.0, 0.4)      | 0.2 (-0.1, 0.6)     | 0.2 (0.0, 0.4)      | 0.2 (0.1, 0.3)      | 0.2 (0.1, 0.3)       |
| <i>miR-20b-5p</i>  | 119.3 (100.1, 138.5) | 119.9 (92.5, 147.2) | 100 (86.3, 113.8)   | 103.6 (79.6, 127.7) | 110.5 (82.7, 138.4) | 98.7 (82.3, 115.1)  | 107.7 (99.8, 115.6)  |
| <i>miR-210-3p</i>  | 0.9 (0.3, 1.6)       | 0.6 (0.1, 1.1)      | 0.8 (0.5, 1.1)      | 1.3 (0.6, 2.0)      | 0.7 (0.3, 1.1)      | 1.0 (0.6, 1.3)      | 0.9 (0.7, 1.0)       |
| <i>miR-214-3p</i>  | 1.1 (0.4, 1.9)       | 1.3 (0.2, 2.4)      | 0.5 (0.2, 0.9)      | 0.9 (0.3, 1.4)      | 1.0 (0.4, 1.6)      | 0.7 (0.3, 1.0)      | 0.9 (0.7, 1.1)       |
| <i>miR-21-5p</i>   | 27.2 (18.2, 36.2)    | 21.4 (14.5, 28.3)   | 24.6 (14.2, 35.1)   | 22.2 (15.7, 28.7)   | 29.2 (20.8, 37.6)   | 24.2 (19.7, 28.6)   | 25.1 (22.4, 27.7)    |
| <i>miR-25-3p</i>   | 89.8 (74.9, 104.8)   | 90.4 (63.6, 117.2)  | 95.6 (67.8, 123.5)  | 92.6 (72.8, 112.4)  | 86.9 (68.1, 105.8)  | 90.7 (70.5, 111.0)  | 90.8 (83.6, 97.9)    |
| <i>miR-26a-5p</i>  | 117.5 (97.7, 137.3)  | 113.9 (87.6, 140.1) | 122.3 (96.5, 148.1) | 109.1 (81.1, 137.1) | 105.1 (87.7, 122.5) | 108.6 (92.2, 125.0) | 111.8 (104.6, 119.1) |
| <i>miR-26b-5p</i>  | 6.6 (4.8, 8.4)       | 6.1 (5.4, 6.8)      | 5.3 (4.4, 6.3)      | 4.3 (2.9, 5.8)      | 5.2 (3.1, 7.4)      | 4.6 (3.9, 5.2)      | 5.3 (4.7, 5.8)       |
| <i>miR-27a-3p</i>  | 46.9 (41.0, 52.7)    | 48.7 (36.8, 60.7)   | 50.0 (43.1, 56.8)   | 55.5 (47, 64.1)     | 53.9 (45.1, 62.7)   | 51.1 (40.9, 61.4)   | 51.4 (48.2, 54.6)    |
| <i>miR-27b-3p</i>  | 31.8 (30.0, 33.6)    | 32.3 (26.7, 37.9)   | 32.7 (28.1, 37.3)   | 35 (29.6, 40.5)     | 34.8 (28.1, 41.5)   | 32.1 (26.0, 38.2)   | 33.2 (31.2, 35.2)    |
| <i>miR-28-5p</i>   | 14.8 (12.4, 17.3)    | 13.7 (6.1, 21.3)    | 13.0 (8.6, 17.3)    | 11.0 (8.2, 13.9)    | 12.6 (8.6, 16.6)    | 13.5 (11, 16)       | 13.0 (11.7, 14.4)    |
| <i>miR-29a-3p</i>  | 21.7 (16.2, 27.3)    | 26.9 (19.8, 34)     | 23.7 (16.9, 30.5)   | 29.3 (23.3, 35.3)   | 30.9 (22.2, 39.6)   | 30.1 (24.0, 36.2)   | 27.7 (25.1, 30.3)    |
| <i>miR-29b-3p</i>  | 8.4 (7.0, 9.7)       | 7.9 (5.4, 10.4)     | 7.6 (3.7, 11.4)     | 7.9 (6.7, 9.0)      | 10.4 (4.9, 15.9)    | 8.7 (7.4, 10.1)     | 8.6 (7.4, 9.8)       |
| <i>miR-30a-5p</i>  | 0.7 (0.4, 1.0)       | 0.9 (0.3, 1.6)      | 0.8 (0.5, 1.1)      | 1.0 (0.6, 1.5)      | 0.7 (0.3, 1.2)      | 0.6 (0.3, 0.9)      | 0.8 (0.7, 0.9)       |
| <i>miR-320b</i>    | 102.9 (93.9, 112.0)  | 88.3 (74.4, 102.2)  | 100.0 (89.7, 110.3) | 98.5 (85.9, 111.0)  | 85.6 (74.1, 97.1)   | 94.6 (81.2, 108.0)  | 94.3 (89.8, 98.8)    |
| <i>miR-328-3p</i>  | 9.6 (6.5, 12.6)      | 7.4 (2.1, 12.8)     | 9.3 (6.2, 12.3)     | 8.1 (4.7, 11.5)     | 5.7 (3.7, 7.7)      | 7.2 (4.7, 9.7)      | 7.7 (6.6, 8.7)       |
| <i>miR-335-5p</i>  | 5.9 (2.8, 8.9)       | 5.1 (3.0, 7.1)      | 4.1 (2.7, 5.6)      | 4.5 (1.6, 7.5)      | 5.4 (3.2, 7.6)      | 5.1 (3.7, 6.5)      | 5.0 (4.3, 5.7)       |
| <i>miR-337-5p</i>  | 2.1 (0.6, 3.6)       | 2.2 (-0.6, 4.9)     | 1.6 (0.6, 2.6)      | 1.7 (0.2, 3.2)      | 1.4 (0.6, 2.2)      | 2.0 (0.6, 3.4)      | 1.8 (1.3, 2.3)       |

Supplemental Table 1 continued

|                    |                      |                       |                      |                       |                       |                      |                      |
|--------------------|----------------------|-----------------------|----------------------|-----------------------|-----------------------|----------------------|----------------------|
| <i>miR-342-3p</i>  | 11 (9.1, 12.9)       | 12.7 (9.8, 15.5)      | 11.9 (8.6, 15.3)     | 18.1 (11.7, 24.5)*    | 15.4 (11.6, 19.2)     | 15.8 (12, 19.7)      | 14.4 (12.9, 16)      |
| <i>miR-34a-5p</i>  | 0.5 (0.0, 1.0)       | 1.6 (-0.3, 3.5)*      | 1.2 (0.7, 1.6)#      | 1.1 (-0.1, 2.3)       | 0.8 (0.4, 1.2)        | 1.1 (0.5, 1.7)       | 1.0 (0.7, 1.3)       |
| <i>miR-363-3p</i>  | 2.2 (0.9, 3.5)       | 2.6 (0.9, 4.4)        | 1.8 (0.7, 2.9)       | 1.4 (0.7, 2.1)        | 1.5 (0.8, 2.2)        | 1.1 (0.4, 1.7)       | 1.7 (1.3, 2.0)       |
| <i>miR-370-3p</i>  | 0.4 (-0.1, 0.8)      | 0.6 (0.3, 0.9)        | 0.5 (0.1, 0.9)       | 0.5 (0.2, 0.9)        | 0.4 (0.1, 0.8)        | 0.5 (0.1, 0.8)       | 0.5 (0.4, 0.6)       |
| <i>miR-423-5p</i>  | 70.9 (60.8, 81.1)    | 70.6 (50.8, 90.4)     | 77.1 (64.2, 89.9)    | 84.1 (70.5, 97.6)     | 69.6 (61.7, 77.4)     | 75.7 (61.9, 89.5)    | 74.6 (70.1, 79)      |
| <i>miR-433-3p</i>  | 0.3 (-0.3, 1.0)      | 0.2 (-0.2, 0.6)       | 0.6 (0.3, 1.0)       | 0.6 (-0.2, 1.3)       | 0.5 (0.0, 1.0)        | 0.3 (-0.1, 0.7)      | 0.4 (0.2, 0.6)       |
| <i>miR-451a</i>    | 800.1 (432, 1168.2)  | 727.6 (379.9, 1075.4) | 639.1 (284.2, 994.1) | 757.8 (414.9, 1100.8) | 795.8 (540.5, 1051.1) | 746.0 (521.3, 970.7) | 747.0 (647.7, 846.3) |
| <i>miR-485-3p</i>  | 3.6 (0.9, 6.3)       | 3.0 (1.3, 4.6)        | 2.0 (0.4, 3.6)       | 1.6 (0.4, 2.7)        | 2.5 (0.7, 4.3)        | 2.7 (1.1, 4.3)       | 2.5 (1.9, 3.1)       |
| <i>miR-486-5p</i>  | 90.3 (41.9, 138.7)   | 83.3 (57.1, 109.4)    | 81.3 (48.2, 114.4)   | 99.5 (65.6, 133.5)    | 95.8 (63.2, 128.4)    | 92.5 (72.1, 112.9)   | 91.1 (80.5, 101.7)   |
| <i>miR-499a-5p</i> | 0.2 (-0.2, 0.7)      | 0.3 (0.1, 0.4)        | 0.3 (-0.1, 0.7)      | 0.1 (0.0, 0.3)        | 0.1 (0.0, 0.2)        | 0.1 (0.0, 0.1)       | 0.2 (0.1, 0.2)       |
| <i>miR-505-5p</i>  | 0.6 (0.1, 1.1)       | 0.4 (0.0, 0.7)        | 0.3 (-0.1, 0.7)      | 0.6 (0.2, 1.0)        | 0.3 (0.0, 0.6)        | 0.4 (0.1, 0.7)       | 0.4 (0.3, 0.5)       |
| <i>miR-590-5p</i>  | 0.7 (0.3, 1.2)       | 0.3 (0.1, 0.5)        | 0.6 (0.3, 0.9)       | 0.6 (0.1, 1.0)        | 0.7 (0.3, 1.1)        | 0.8 (0.3, 1.2)       | 0.6 (0.5, 0.8)       |
| <i>miR-92a-3p</i>  | 111.1 (84.0, 138.1)  | 103.2 (84.4, 122.1)   | 112.4 (96.2, 128.5)  | 124.6 (103.0, 146.1)  | 110.8 (88.9, 132.7)   | 100.4 (86.8, 113.9)  | 109.9 (103, 116.8)   |
| <i>miR-93-5p</i>   | 249.6 (226.5, 272.7) | 235.0 (209.1, 261)    | 245.7 (221.1, 270.3) | 249.2 (223.6, 274.9)  | 253.0 (234.8, 271.2)  | 246.4 (225.9, 266.9) | 247.1 (239.6, 254.6) |

For descriptive statistics, mean and 95% confidence intervals of all 65 miRNAs post filtered air and O<sub>3</sub> exposure were presented for each dietary group.

For statistical analysis, data were first log-transformed and a two-factor (O<sub>3</sub> exposure and supplementation status) mixed effects model with a participant-specific random intercept. Pair-wise comparisons were adjusted using Tukey's tests. \*  $p < 0.05$  indicate significant differences between filtered air and O<sub>3</sub> exposure in each dietary group. #  $p < 0.05$  indicate significant differences in FO or OO group compared with CTL group on the filtered air or O<sub>3</sub> exposure day.

CTL: control, FO: fish oil, OO: olive oil.

**Supplemental Table 2.** Parameters of type III statistics of changes in circulating miRNAs affected by experimental conditions.

| miRNAs             | Ozone exposure |          | Dietary supplementation |          | Interaction    |          |
|--------------------|----------------|----------|-------------------------|----------|----------------|----------|
|                    | <i>F</i> value | <i>p</i> | <i>F</i> value          | <i>p</i> | <i>F</i> value | <i>p</i> |
| <i>let-7d-5p</i>   | 0.460          | 0.506    | 0.910                   | 0.420    | 0.740          | 0.488    |
| <i>let-7e-5p</i>   | 4.210          | 0.0536   | 1.500                   | 0.246    | 0.040          | 0.961    |
| <i>let-7g-5p</i>   | 0.430          | 0.520    | 0.120                   | 0.891    | 1.410          | 0.267    |
| <i>let-7i-5p</i>   | 0.000          | 0.997    | 0.910                   | 0.419    | 0.100          | 0.901    |
| <i>miR-375</i>     | 2.930          | 0.103    | 1.580                   | 0.231    | 0.240          | 0.790    |
| <i>miR-103a-3p</i> | 2.050          | 0.168    | 0.040                   | 0.963    | 0.660          | 0.527    |
| <i>miR-106b-5p</i> | 0.050          | 0.830    | 0.010                   | 0.987    | 0.360          | 0.702    |
| <i>miR-122-5p</i>  | 7.090          | 0.015    | 1.210                   | 0.320    | 2.860          | 0.081    |
| <i>miR-124-3p</i>  | 0.690          | 0.421    | 0.970                   | 0.404    | 0.080          | 0.922    |
| <i>miR-125a-5p</i> | 1.420          | 0.256    | 0.370                   | 0.700    | 0.270          | 0.772    |
| <i>miR-125b-5p</i> | 0.320          | 0.588    | 0.000                   | 0.998    | 3.090          | 0.095    |
| <i>miR-126-3p</i>  | 0.010          | 0.935    | 0.120                   | 0.885    | 0.050          | 0.954    |
| <i>miR-133a-3p</i> | 0.000          | 0.949    | 0.500                   | 0.616    | 0.490          | 0.625    |
| <i>miR-133b</i>    | 0.020          | 0.892    | 0.070                   | 0.937    | 0.080          | 0.920    |
| <i>miR-142-3p</i>  | 0.300          | 0.589    | 0.060                   | 0.942    | 0.350          | 0.709    |
| <i>miR-144-5p</i>  | 6.390          | 0.0448   | 1.220                   | 0.359    | 4.420          | 0.066    |
| <i>miR-145-5p</i>  | 0.110          | 0.746    | 0.520                   | 0.600    | 0.220          | 0.808    |
| <i>miR-146a-5p</i> | 0.370          | 0.549    | 3.860                   | 0.0383   | 0.240          | 0.785    |
| <i>miR-150-5p</i>  | 3.040          | 0.0964   | 0.750                   | 0.487    | 1.460          | 0.256    |
| <i>miR-155-5p</i>  | 2.840          | 0.116    | 1.220                   | 0.327    | 3.050          | 0.082    |
| <i>miR-15b-5p</i>  | 1.430          | 0.245    | 0.560                   | 0.581    | 0.070          | 0.929    |
| <i>miR-16-5p</i>   | 0.450          | 0.508    | 0.100                   | 0.902    | 0.050          | 0.955    |
| <i>miR-17-5p</i>   | 1.080          | 0.310    | 1.060                   | 0.365    | 0.550          | 0.583    |
| <i>miR-181b-5p</i> | 2.630          | 0.121    | 0.720                   | 0.500    | 0.640          | 0.538    |
| <i>miR-18a-5p</i>  | 2.230          | 0.151    | 0.740                   | 0.489    | 0.020          | 0.983    |
| <i>miR-192-5p</i>  | 4.370          | 0.0496   | 0.300                   | 0.746    | 0.920          | 0.414    |
| <i>miR-194-5p</i>  | 7.830          | 0.0111   | 0.050                   | 0.955    | 0.440          | 0.651    |
| <i>miR-195-5p</i>  | 0.160          | 0.696    | 0.870                   | 0.432    | 1.130          | 0.342    |
| <i>miR-199a-3p</i> | 0.710          | 0.410    | 0.100                   | 0.904    | 0.220          | 0.808    |
| <i>miR-199a-5p</i> | 7.140          | 0.0146   | 0.360                   | 0.700    | 0.280          | 0.755    |
| <i>miR-19a-3p</i>  | 5.470          | 0.0299   | 0.040                   | 0.958    | 2.200          | 0.137    |
| <i>miR-1-3p</i>    | 1.070          | 0.335    | 0.040                   | 0.957    | 0.640          | 0.557    |
| <i>miR-208a-3p</i> | 0.040          | 0.840    | 0.220                   | 0.809    | 0.320          | 0.737    |
| <i>miR-208b-3p</i> | 1.540          | 0.239    | 0.140                   | 0.867    | 0.140          | 0.875    |
| <i>miR-20b-5p</i>  | 0.110          | 0.741    | 1.680                   | 0.212    | 0.190          | 0.826    |
| <i>miR-210-3p</i>  | 0.920          | 0.351    | 0.770                   | 0.477    | 0.750          | 0.488    |
| <i>miR-214-3p</i>  | 0.370          | 0.552    | 2.310                   | 0.128    | 2.130          | 0.148    |
| <i>miR-21-5p</i>   | 2.810          | 0.109    | 0.890                   | 0.427    | 0.240          | 0.789    |

| Supplemental Table 2 continued |       |        |       |        |       |       |
|--------------------------------|-------|--------|-------|--------|-------|-------|
| <i>miR-25-3p</i>               | 0.000 | 0.982  | 0.200 | 0.817  | 0.090 | 0.917 |
| <i>miR-26a-5p</i>              | 0.720 | 0.406  | 0.410 | 0.672  | 0.950 | 0.404 |
| <i>miR-26b-5p</i>              | 1.480 | 0.238  | 3.940 | 0.0361 | 0.590 | 0.563 |
| <i>miR-27a-3p</i>              | 0.140 | 0.712  | 0.520 | 0.605  | 0.980 | 0.392 |
| <i>miR-27b-3p</i>              | 0.000 | 0.993  | 0.120 | 0.886  | 0.760 | 0.479 |
| <i>miR-28-5p</i>               | 0.200 | 0.656  | 0.550 | 0.584  | 0.660 | 0.526 |
| <i>miR-29a-3p</i>              | 2.830 | 0.108  | 1.530 | 0.240  | 0.800 | 0.461 |
| <i>miR-29b-3p</i>              | 0.000 | 0.960  | 0.930 | 0.409  | 0.450 | 0.643 |
| <i>miR-30a-5p</i>              | 0.020 | 0.876  | 1.300 | 0.295  | 0.140 | 0.869 |
| <i>miR-320b</i>                | 0.360 | 0.553  | 1.640 | 0.218  | 3.110 | 0.067 |
| <i>miR-328-3p</i>              | 0.160 | 0.690  | 1.130 | 0.344  | 1.420 | 0.265 |
| <i>miR-335-5p</i>              | 0.050 | 0.826  | 0.910 | 0.419  | 0.070 | 0.936 |
| <i>miR-337-5p</i>              | 0.110 | 0.740  | 0.450 | 0.647  | 0.890 | 0.428 |
| <i>miR-342-3p</i>              | 4.080 | 0.0571 | 2.110 | 0.148  | 1.560 | 0.234 |
| <i>miR-34a-5p</i>              | 4.770 | 0.0441 | 0.960 | 0.404  | 2.950 | 0.081 |
| <i>miR-363-3p</i>              | 0.570 | 0.458  | 3.210 | 0.0617 | 0.440 | 0.650 |
| <i>miR-370-3p</i>              | 3.010 | 0.102  | 0.040 | 0.963  | 0.290 | 0.752 |
| <i>miR-423-5p</i>              | 0.480 | 0.496  | 1.770 | 0.196  | 0.290 | 0.753 |
| <i>miR-433-3p</i>              | 0.000 | 0.986  | 0.580 | 0.587  | 1.790 | 0.236 |
| <i>miR-451a</i>                | 0.030 | 0.857  | 0.150 | 0.864  | 0.690 | 0.513 |
| <i>miR-485-3p</i>              | 0.230 | 0.638  | 1.270 | 0.307  | 1.580 | 0.234 |
| <i>miR-486-5p</i>              | 0.630 | 0.436  | 0.080 | 0.923  | 0.500 | 0.616 |
| <i>miR-499a-5p</i>             | 0.100 | 0.758  | 0.030 | 0.974  | 1.320 | 0.315 |
| <i>miR-505-5p</i>              | 0.240 | 0.632  | 0.060 | 0.938  | 2.550 | 0.123 |
| <i>miR-590-5p</i>              | 1.220 | 0.284  | 0.880 | 0.431  | 0.600 | 0.561 |
| <i>miR-92a-3p</i>              | 0.090 | 0.770  | 1.160 | 0.335  | 1.170 | 0.331 |
| <i>miR-93-5p</i>               | 1.100 | 0.306  | 0.200 | 0.823  | 0.740 | 0.491 |

For statistical analysis, data were first log-transformed and a two-factor (O<sub>3</sub> exposure and supplementation status) mixed effects model with a participant-specific random intercept. *F* and *p* values of the type III statistics of the mixed-effects model are presented for each miRNA.

CTL: control, FO: fish oil, OO: olive oil.

**Supplemental Table 3.** Descriptive statistics of blood protein parameters

| Biomarkers   | CTL (n=6)              |                        | FO (n=7)                    |                        | OO (n=10)                   |                           | All (n=23)             |
|--------------|------------------------|------------------------|-----------------------------|------------------------|-----------------------------|---------------------------|------------------------|
|              | Filtered air           | Ozone                  | Filtered air                | Ozone                  | Filtered air                | Ozone                     |                        |
| CRP          | 525 (88, 962)          | 546.7 (3, 1090.3)      | 788.8 (-45.7, 1623.3)       | 792.2 (-124.4, 1708.8) | 794.6 (-203.1, 1792.4)      | 1347.6 (-888.9, 3584.1)   | 846.1 (356.7, 1335.5)  |
| D-Dimer      | 130.5 (82.5, 178.5)    | 121.1 (74.1, 168)      | 170.7 (63.3, 278.1)         | 151.1 (59.5, 242.7)    | 132.2 (86, 178.5)           | 125.2 (83.1, 167.3)       | 137.8 (116, 159.5)     |
| E-selectin   | 44 (28.1, 59.9)        | 40.9 (23.1, 58.6)      | 48.4 (31.8, 65.1)           | 43.5 (28.5, 58.4)*     | 43.2 (33.7, 52.7)           | 42.4 (32.3, 52.4)         | 43.7 (39.3, 48)        |
| IL-6         | 0.5 (0.4, 0.6)         | 1.1 (0.8, 1.5)*        | 0.8 (0.3, 1.3)              | 1.1 (0.6, 1.5)         | 0.6 (0.3, 1)                | 1.4 (0.9, 1.8)*           | 0.9 (0.8, 1.1)         |
| IL-8         | 2.2 (1.5, 2.8)         | 2.4 (1.8, 3)           | 2.5 (1.8, 3.2)              | 2.8 (1.6, 3.9)         | 2.5 (2, 3)                  | 2.4 (2, 2.8)              | 2.5 (2.2, 2.7)         |
| IL-1 $\beta$ | 0.1 (0.1, 0.1)         | 0.1 (0.1, 0.1)         | 0.1 (0.1, 0.1) <sup>#</sup> | 0.1 (0.1, 0.1)         | 0.1 (0.1, 0.1) <sup>#</sup> | 0.1 (0.1, 0.1)            | 0.1 (0.1, 0.1)         |
| SAA          | 1426.8 (346.9, 2506.8) | 1073.2 (319.3, 1827.1) | 948.2 (378.4, 1518)         | 828.3 (331.2, 1325.4)  | 2526.6 (-1557.9, 6611.1)    | 5295.7 (-5006.6, 15598.1) | 2296.9 (172.1, 4421.7) |
| TNF $\alpha$ | 0.8 (0.6, 1)           | 0.8 (0.6, 1)           | 0.7 (0.5, 0.9)              | 0.7 (0.5, 0.8)         | 0.9 (0.7, 1)                | 0.8 (0.7, 1)              | 0.8 (0.7, 0.8)         |
| sICAM1       | 202 (172.4, 231.5)     | 202.7 (174, 231.3)     | 212.8 (171.4, 254.2)        | 213.9 (173, 254.9)     | 215 (194.7, 235.3)          | 213.4 (190.4, 236.4)      | 210.9 (201, 220.7)     |
| sVCAM1       | 251.3 (215.9, 286.8)   | 256.1 (214.5, 297.6)   | 233.7 (188.7, 278.7)        | 240.5 (181.9, 299.1)   | 291.2 (248.4, 333.9)        | 294.9 (253.1, 336.8)      | 265.8 (249, 282.5)     |
| vWF          | 11.8 (8.9, 14.7)       | 13.6 (9.1, 18)         | 10.4 (5.8, 14.9)            | 10 (6.5, 13.6)         | 12.5 (9.7, 15.3)            | 11.6 (9.3, 13.9)          | 11.7 (10.5, 12.8)      |

For descriptive statistics, mean and 95% confidence intervals of all 11 protein biomarkers post filtered air and O<sub>3</sub> exposure were presented for each dietary group.

For statistical analysis, data were first log-transformed and a two-factor (O<sub>3</sub> exposure and supplementation status) mixed effects model with a participant-specific random intercept. Pair-wise comparisons were adjusted using Tukey's tests. \*  $p < 0.05$  indicate significant differences between filtered air and O<sub>3</sub> exposure in each dietary group. <sup>#</sup>  $p < 0.05$  indicate significant differences in FO or OO group compared with CTL group on the filtered air or O<sub>3</sub> exposure day.

CRP: c-reactive protein, CTL: control, IL: interleukin, FO: fish oil, OO: olive oil, SAA: serum amyloid A, sICAM1: soluble intercellular adhesion molecule 1, sVCAM1: soluble vascular cell adhesion molecule 1, TNF $\alpha$ : tumor necrosis factor alpha, vWF: von Willebrand factor.
